# Supplementary material for: STAT3 Is the Master Regulator for the Forming of 3D Spheroids of 3T3-L1 Preadipocytes
Source: MDPI journal article supplement (doi:10.3390/cells11020300), 2022-01-16
Supplement: s1 [file s1]

# Table S1

Supplementary Table 1. Primers for qPCR.

| Gene          | Forward primer (5' to 3')  | Reverse primer (5' to 3')   | TaqMan probe (5' to 3')                              |
|---------------|----------------------------|-----------------------------|------------------------------------------------------|
| <i>Pparγ</i>  | CTGCTCCACACTATGAAGACA<br>T | TGCAGGTTCTACTTTGATCG<br>C   | /FAM/AGCTGACCC/ZEN/AATGGTTGCTGATTACA/IABkFQ/         |
| <i>Cebpa</i>  | ACAAGAACAGCAACGAGTAC<br>C  | TCATTGTCACTGGTCAACTC<br>C   | /FAM/CGCAAGAGC/ZEN/CGAGATAAAGCCAAAC/IABkFQ/<br>/FAM/ |
| <i>Ap2</i>    | AAATCACCGCAGACGACAG        | CCTTTCATAACACATTCCAC<br>CAC | TGAAGAGCA/ZEN/TCATAACCCTAGATGGCG/IABkFQ/<br>/        |
| <i>Leptin</i> | GTGCCTATCCAGAAAGTCCA<br>G  | AATGAAGTCCAAGCCAGTGA        | /FAM/ACCGACTGC/ZEN/GTGTGTGAAATGTCA/IABkFQ/<br>/56-   |
| <i>AdipoQ</i> | GCAGGATTAAGAGGAACAGG<br>AG | TGTCTGTACGATTGTCAGTG<br>G   | FAM/ACGACACCA/ZEN/AAAGGGCTCAGGAT/3IABkFQ/<br>Q/      |
| <i>36b4</i>   | TTATAACCCTGAAGTGCTCGA<br>C | CGCTTGTACCCATTGATGAT<br>G   | /FAM/AGGCCCTGC/ZEN/ACTCTCGCTT/IABkFQ/                |

Table S2

Supplementary Table 2. Top 60 genes of upregulation and down regulation

| Upregulation (Total: 826 genes) |                              |               |                      | Downregulation (Total: 725 genes) |                              |                        |              |
|---------------------------------|------------------------------|---------------|----------------------|-----------------------------------|------------------------------|------------------------|--------------|
|                                 | log 2 Fold<br>Change (3D/2D) | Gene symbol   | Gene biotype         |                                   | log 2 Fold<br>Change (3D/2D) | Gene symbol            | Gene biotype |
| 1                               | 9.00                         | Selp          | protein_coding       | -8.01                             | Ogn                          | protein_coding         |              |
| 2                               | 8.94                         | U90926        | protein_coding       | -7.93                             | Tinag                        | protein_coding         |              |
| 3                               | 7.85                         | Ranbp3l       | protein_coding       | -7.44                             | Inmt                         | protein_coding         |              |
| 4                               | 7.82                         | Plin1         | protein_coding       | -7.12                             | Pgm5                         | protein_coding         |              |
| 5                               | 7.66                         | Ccr1          | protein_coding       | -7.06                             | Rnf112                       | protein_coding         |              |
| 6                               | 7.56                         | Rab15         | protein_coding       | -6.79                             | 1500015O10Rik                | protein_coding         |              |
| 7                               | 7.00                         | Gm16548       | lincRNA              | -6.78                             | Omd                          | protein_coding         |              |
| 8                               | 6.98                         | Gm567         | lincRNA              | -6.76                             | Angptl7                      | protein_coding         |              |
| 9                               | 6.89                         | Lgr6          | protein_coding       | -6.48                             | Bmp4                         | protein_coding         |              |
| 10                              | 6.89                         | Gucy2g        | protein_coding       | -6.34                             | Fhod3                        | protein_coding         |              |
| 11                              | 6.89                         | Saa3          | protein_coding       | -6.17                             | Cpa1                         | protein_coding         |              |
| 12                              | 6.83                         | Ing4          | protein_coding       | -6.14                             | 9130208D14Rik                | unprocessed_pseudogene |              |
| 13                              | 6.83                         | Nos2          | protein_coding       | -6.13                             | Itgbl1                       | protein_coding         |              |
| 14                              | 6.80                         | Tnn           | protein_coding       | -6.08                             | Trhde                        | protein_coding         |              |
| 15                              | 6.63                         | Accsl         | protein_coding       | -6.04                             | Tek                          | protein_coding         |              |
| 16                              | 6.60                         | Camp          | protein_coding       | -6.01                             | Fgf14                        | protein_coding         |              |
| 17                              | 6.58                         | Gm43609       | TEC                  | -5.77                             | Ifi2712a                     | protein_coding         |              |
| 18                              | 6.52                         | Hr            | protein_coding       | -5.73                             | Slc4a10                      | protein_coding         |              |
| 19                              | 6.49                         | Myo1g         | protein_coding       | -5.69                             | Igf2                         | protein_coding         |              |
| 20                              | 6.49                         | Rasgrp2       | protein_coding       | -5.67                             | Aldh1a7                      | protein_coding         |              |
| 21                              | 6.44                         | Stfa3         | protein_coding       | -5.5                              | Optc                         | protein_coding         |              |
| 22                              | 6.43                         | Snord43       | miRNA                | -5.45                             | Nkain2                       | protein_coding         |              |
| 23                              | 6.36                         | Gm37309       | TEC                  | -5.36                             | Clec3b                       | protein_coding         |              |
| 24                              | 6.32                         | Cd79a         | protein_coding       | -5.32                             | Rgag1                        | protein_coding         |              |
| 25                              | 6.32                         | Chad          | protein_coding       | -5.25                             | Ctsc                         | protein_coding         |              |
| 26                              | 6.26                         | Nppb          | protein_coding       | -5.15                             | Aldh1a1                      | protein_coding         |              |
| 27                              | 6.26                         | Gm14508       | antisense            | -5.15                             | Sult1a1                      | protein_coding         |              |
| 28                              | 6.25                         | Ngef          | protein_coding       | -4.72                             | Chrdl1                       | protein_coding         |              |
| 29                              | 6.2                          | Cyth4         | protein_coding       | -4.69                             | Ccl6                         | protein_coding         |              |
| 30                              | 6.18                         | Cck           | protein_coding       | -4.62                             | Agtr2                        | protein_coding         |              |
| 31                              | 6.14                         | Gm16587       | antisense            | -4.56                             | Fmod                         | protein_coding         |              |
| 32                              | 6.13                         | 2700080J24Rik | TEC                  | -4.55                             | Krt8                         | protein_coding         |              |
| 33                              | 6.11                         | Slco4a1       | protein_coding       | -4.43                             | Gm42922                      | TEC                    |              |
| 34                              | 6.07                         | Notumos       | antisense            | -4.43                             | Prex2                        | protein_coding         |              |
| 35                              | 6.07                         | Spink6        | protein_coding       | -4.41                             | Nrk                          | protein_coding         |              |
| 36                              | 5.98                         | Ces1f         | protein_coding       | -4.41                             | Prokr1                       | protein_coding         |              |
| 37                              | 5.93                         | Kcnk10        | protein_coding       | -4.41                             | Me3                          | protein_coding         |              |
| 38                              | 5.93                         | Gm26621       | processed_transcript | -4.37                             | Adm                          | protein_coding         |              |
| 39                              | 5.93                         | Lce1f         | protein_coding       | -4.36                             | Actr3b                       | protein_coding         |              |
| 40                              | 5.93                         | Mir155hg      | lincRNA              | -4.33                             | H19                          | lincRNA                |              |
| 41                              | 5.93                         | Gm26514       | lincRNA              | -4.3                              | Dchs2                        | protein_coding         |              |
| 42                              | 5.92                         | Hsbp1l1       | protein_coding       | -4.29                             | Gm27786                      | misc_RNA               |              |
| 43                              | 5.86                         | Lcn2          | protein_coding       | -4.25                             | Bnc1                         | protein_coding         |              |
| 44                              | 5.85                         | RP23-14P17.5  | sense_intronic       | -4.16                             | Gpihbp1                      | protein_coding         |              |
| 45                              | 5.85                         | Il23r         | protein_coding       | -4.15                             | Cpz                          | protein_coding         |              |
| 46                              | 5.85                         | Ucn2          | protein_coding       | -4.15                             | Krt7                         | protein_coding         |              |
| 47                              | 5.85                         | Scg5          | protein_coding       | -4.07                             | Sorbs2                       | protein_coding         |              |
| 48                              | 5.85                         | Gm26789       | lincRNA              | -4.01                             | Mylk3                        | protein_coding         |              |
| 49                              | 5.85                         | 2310007B03Rik | protein_coding       | -3.96                             | Gm16559                      | antisense              |              |
| 50                              | 5.84                         | Lrg1          | protein_coding       | -3.96                             | Myl9                         | protein_coding         |              |
| 51                              | 5.84                         | Rdh8          | protein_coding       | -3.95                             | Sdpr                         | protein_coding         |              |
| 52                              | 5.77                         | Greb1         | protein_coding       | -3.91                             | Mlana                        | protein_coding         |              |
| 53                              | 5.77                         | Atp13a4       | protein_coding       | -3.88                             | Col11a1                      | protein_coding         |              |
| 54                              | 5.77                         | Vipr2         | protein_coding       | -3.88                             | Adh1                         | protein_coding         |              |
| 55                              | 5.77                         | Rnf183        | protein_coding       | -3.86                             | Mfap5                        | protein_coding         |              |
| 56                              | 5.77                         | Gm37755       | TEC                  | -3.84                             | Gm27483                      | misc_RNA               |              |
| 57                              | 5.76                         | Pla2g4b       | protein_coding       | -3.82                             | Cdh26                        | protein_coding         |              |
| 58                              | 5.76                         | Gm43702       | TEC                  | -3.81                             | Sema5b                       | protein_coding         |              |
| 59                              | 5.67                         | Mroh4         | protein_coding       | -3.76                             | Gm14434                      | protein_coding         |              |
| 60                              | 5.67                         | Snora34       | snoRNA               | -3.7                              | Efemp1                       | protein_coding         |              |

# Table S3

Supplementary Table 3. Possible upstream regulators by IPA upstream analysis

| Upstream Regulator | Exp Fold Change | Molecule Type                     | Predicted Activation State | Activation z-score | p-value of overlap |
|--------------------|-----------------|-----------------------------------|----------------------------|--------------------|--------------------|
| TNF                |                 | cytokine                          | Activated                  | 4.882              | 2.53E-55           |
| lipopolysaccharide |                 | chemical drug                     | Activated                  | 3.541              | 5.27E-54           |
| PDGF BB            |                 | complex                           | Activated                  | 5.740              | 1.95E-50           |
| TGF 1              | ↑ 1.143         | growth factor                     |                            | 1.960              | 1.61E-48           |
| STAT3              | ↑ 1.029         | transcription regulator           | Activated                  | 4.465              | 1.83E-47           |
| dexamethasone      |                 | chemical drug                     | Inhibited                  | -3.535             | 4.10E-46           |
| AGT                | ↑ 1.301         | growth factor                     |                            | 1.722              | 2.87E-44           |
| beta-estradiol     |                 | chemical-endogenous               | Activated                  | 2.178              | 4.27E-43           |
| IFNG               |                 | cytokine                          |                            | 1.452              | 2.24E-42           |
| IL1                |                 | cytokine                          | Activated                  | 4.239              | 7.93E-41           |
| KRAS               |                 | enzyme                            | Activated                  | 3.919              | 5.68E-36           |
| tretinoin          |                 | chemical-endogenous               |                            | 0.701              | 1.32E-35           |
| CG                 |                 | complex                           |                            | 0.728              | 2.23E-35           |
| IL6                | ↑ 3.458         | cytokine                          | Activated                  | 4.804              | 7.10E-35           |
| NFKBIA             |                 | transcription regulator           |                            | 1.145              | 1.92E-31           |
| HRAS               |                 | enzyme                            | Activated                  | 3.153              | 2.51E-31           |
| TP53               |                 | transcription regulator           |                            | -1.913             | 3.26E-31           |
| JUN                |                 | transcription regulator           | Activated                  | 3.603              | 1.04E-29           |
| CTNNB1             |                 | transcription regulator           |                            | 0.348              | 1.83E-29           |
| U0126              |                 | chemical drug                     | Inhibited                  | -3.583             | 2.20E-28           |
| IL10RA             |                 | transmembrane receptor            |                            | -1.573             | 4.15E-28           |
| poly rI:C-RNA      |                 | biologic drug                     |                            | 0.805              | 4.20E-28           |
| FOS                | ↑ 1.512         | transcription regulator           | Activated                  | 3.086              | 5.01E-28           |
| SB203580           |                 | chemical drug                     | Inhibited                  | -3.908             | 2.08E-27           |
| TAZ                |                 | enzyme                            |                            | -0.765             | 2.57E-27           |
| Tgf                |                 | group                             |                            | 1.004              | 3.07E-27           |
| IGF1               |                 | growth factor                     | Activated                  | 4.333              | 4.89E-27           |
| IKBKB              |                 | kinase                            |                            | 1.505              | 4.90E-27           |
| YAP1               |                 | transcription regulator           |                            | -0.181             | 1.66E-26           |
| WNT3A              |                 | cytokine                          |                            | 0.531              | 2.02E-26           |
| OSM                |                 | cytokine                          | Activated                  | 3.136              | 3.80E-26           |
| G protein          |                 | group                             |                            | -1.722             | 3.87E-26           |
| ESR2               |                 | ligand-dependent nuclear receptor | Activated                  | 2.027              | 4.41E-26           |
| CHUK               |                 | kinase                            |                            | 1.880              | 1.19E-25           |
| KDM1A              |                 | enzyme                            |                            | 0.895              | 2.69E-25           |
| MYC                | ↑ 1.548         | transcription regulator           |                            | 0.041              | 2.95E-25           |
| GNA15              |                 | enzyme                            |                            |                    | 8.09E-25           |
| PPARGC1A           |                 | transcription regulator           | Activated                  | 2.038              | 1.76E-24           |
| PNPT1              |                 | enzyme                            | Activated                  | 4.518              | 1.98E-24           |
| cardiotoxin        |                 | chemical-other                    | Activated                  | 2.268              | 2.42E-24           |
| CITED2             |                 | transcription regulator           |                            | 0.676              | 2.54E-24           |
| IL17A              |                 | cytokine                          | Activated                  | 4.552              | 2.63E-24           |
| Alpha catenin      |                 | group                             |                            | -0.148             | 2.70E-24           |
| IFNB1              |                 | cytokine                          | Inhibited                  | -4.301             | 3.94E-24           |
| NFkB(complex)      |                 | complex                           | Activated                  | 4.280              | 4.43E-24           |
| Ige                |                 | complex                           | Activated                  | 4.217              | 5.64E-24           |
| STAT1              |                 | transcription regulator           | Inhibited                  | -2.142             | 7.53E-24           |
| cycloheximide      |                 | chemical reagent                  |                            | 0.803              | 1.25E-23           |
| IKBKG              |                 | kinase                            |                            | 0.450              | 1.87E-23           |
| LY294002           |                 | chemical drug                     | Inhibited                  | -2.622             | 2.14E-23           |

Figure S1

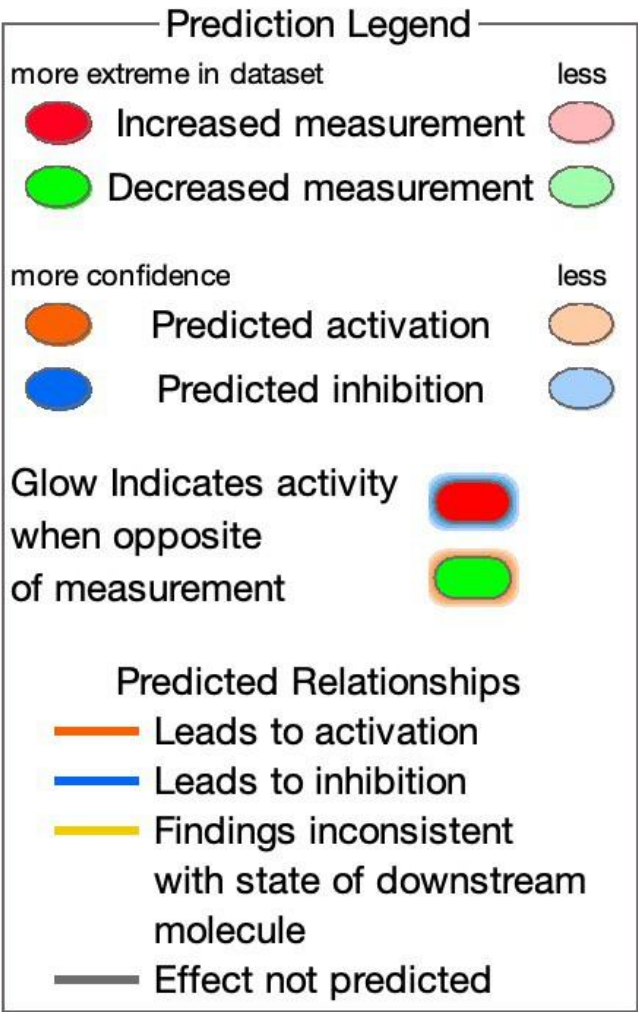

Figure S1: Prediction Legend.

Figure S2

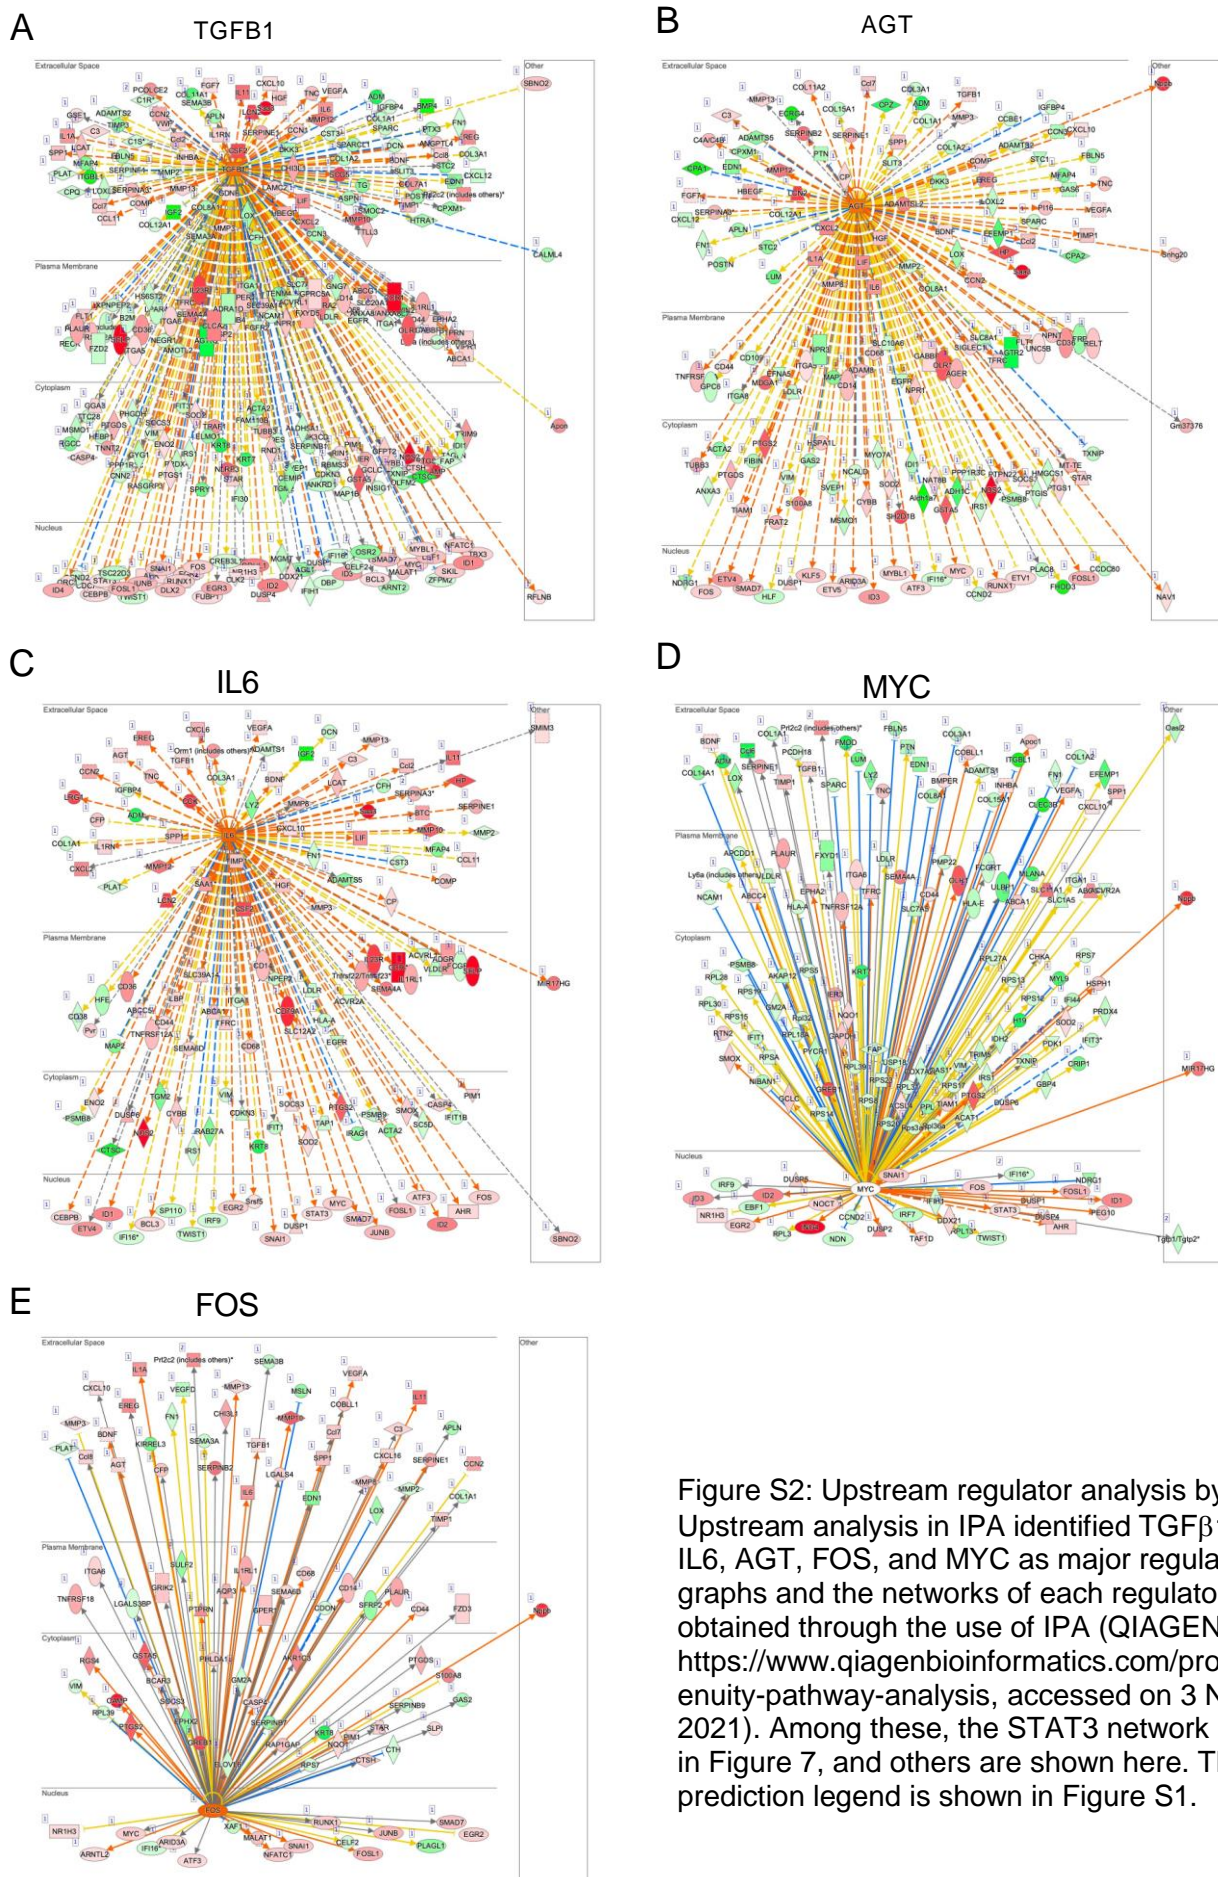

Figure S2: Upstream regulator analysis by IPA. Upstream analysis in IPA identified TGF $\beta$ 1, STAT3, IL6, AGT, FOS, and MYC as major regulators. The graphs and the networks of each regulator were obtained through the use of IPA (QIAGEN Inc., <https://www.qiagenbioinformatics.com/products/ingenuity-pathway-analysis>, accessed on 3 November 2021). Among these, the STAT3 network is shown in Figure 7, and others are shown here. The prediction legend is shown in Figure S1.

## Figure S3A

## Network 1

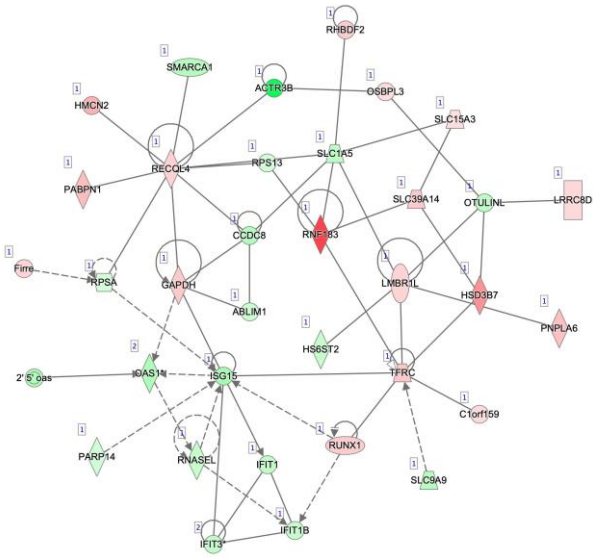

## Network 2

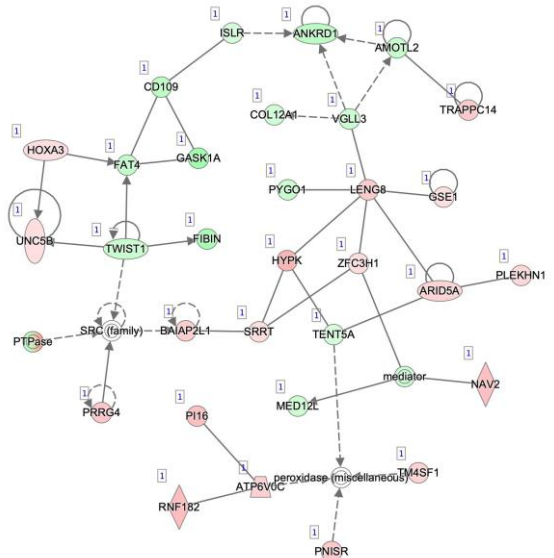

### Network 3

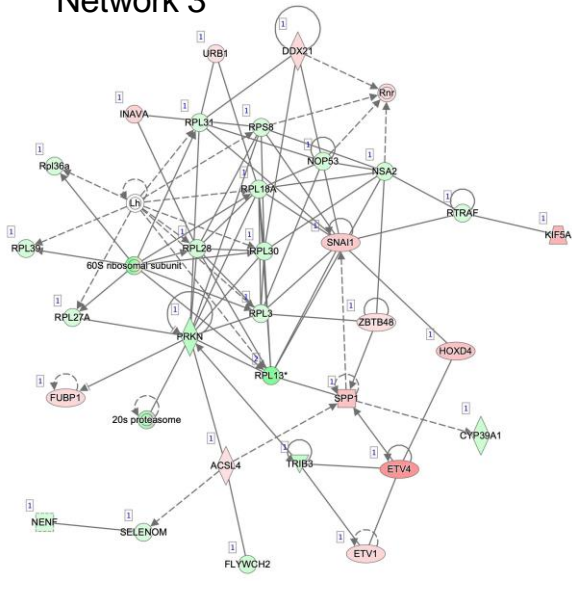

## Network 4

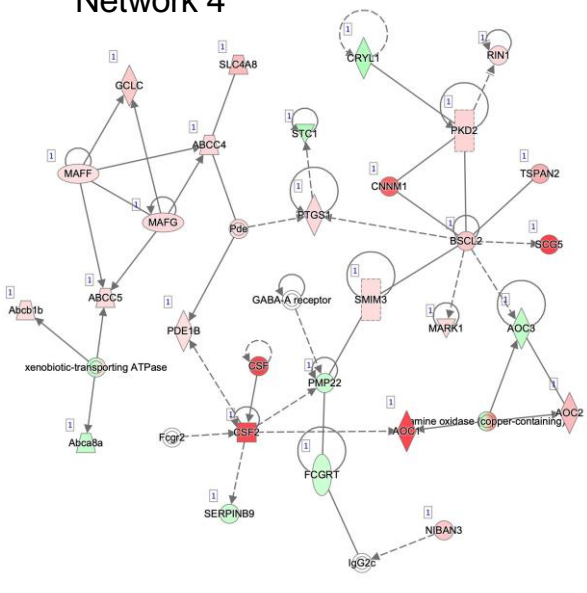

## Network 6

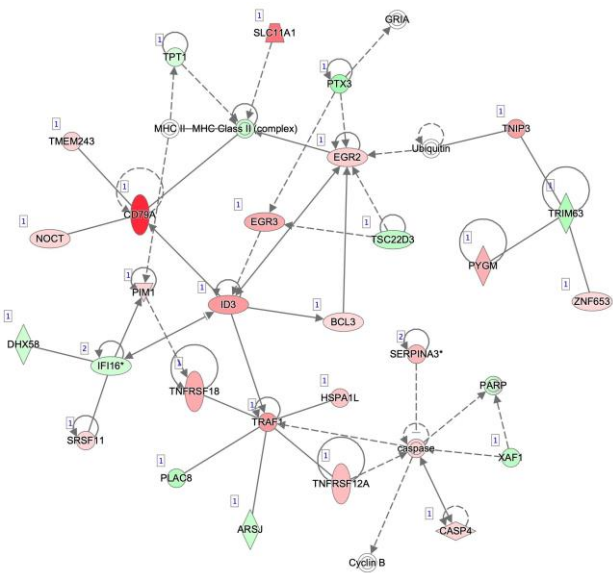

## Network 8

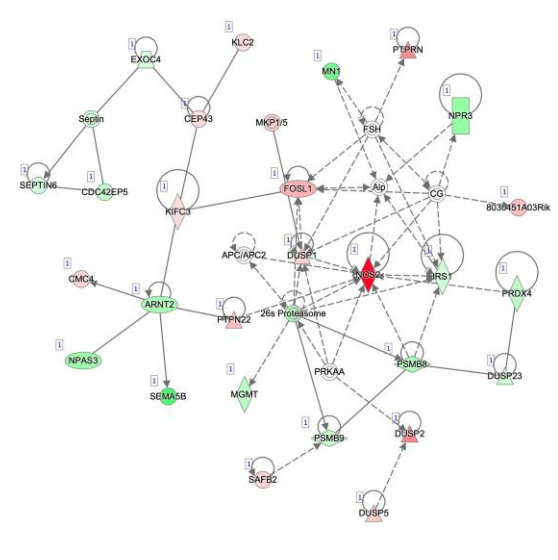

### Figure S3B

## Network 9

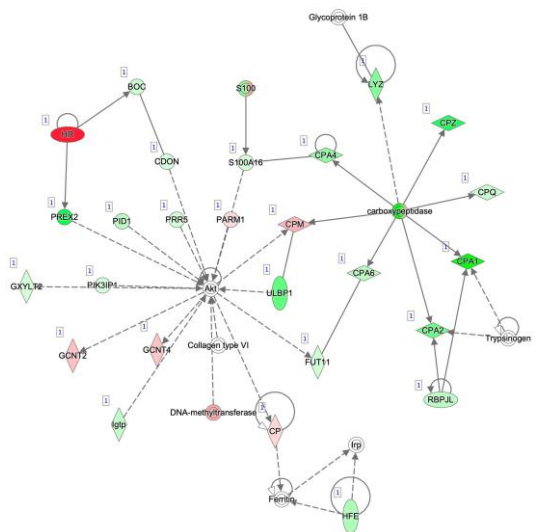

## Network 11

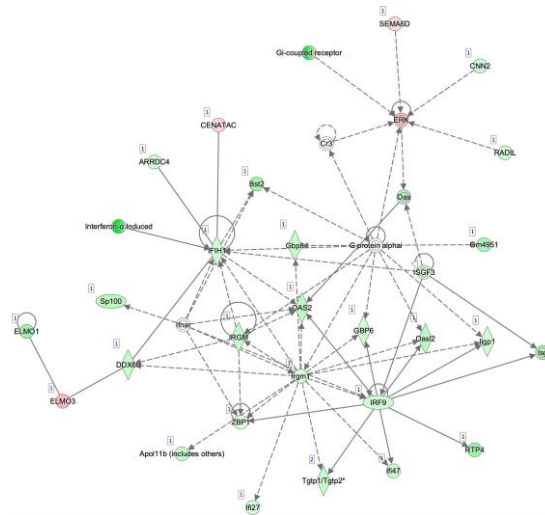

## Network 12

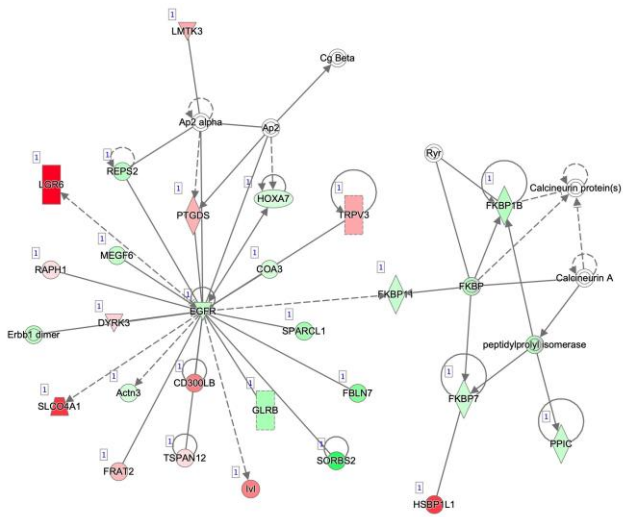

## Network 13

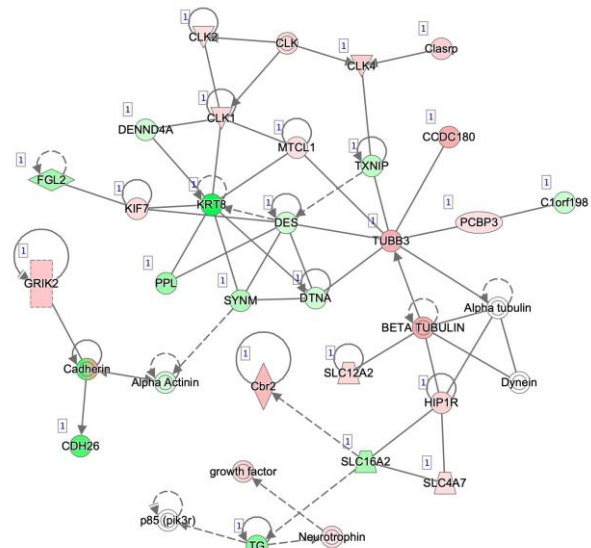

## Network 14

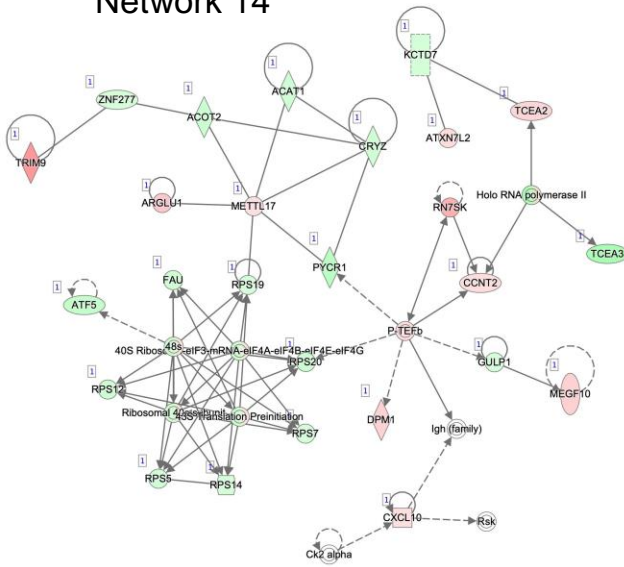

Figure S3: Top 14 causal networks of diseases and functions with IPA network score more than 30 (A: networks 1, 2, 3, 4, 6 and 8, B: networks 9, 11, 12, 13, and 14). Prediction legend is shown in Figure S1.

# Figure S4

A

Network 5 (AGT)

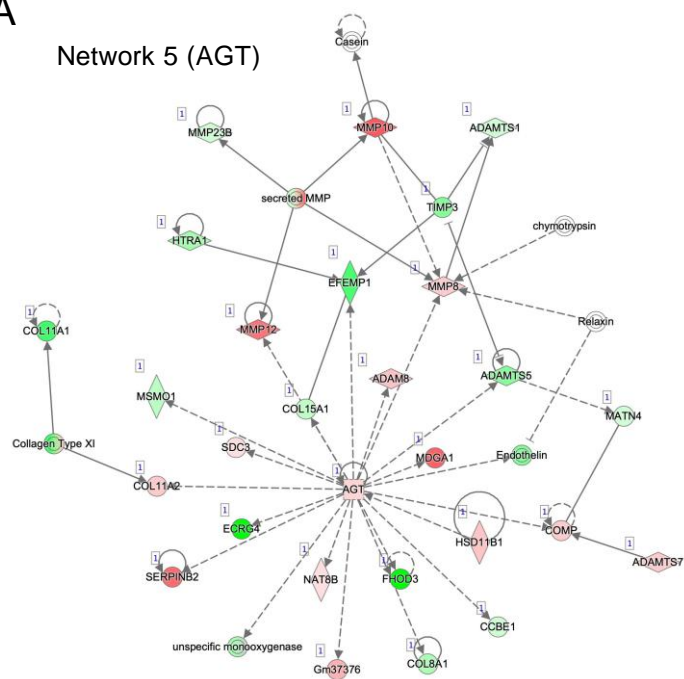

B

Network 7 (STAT3)

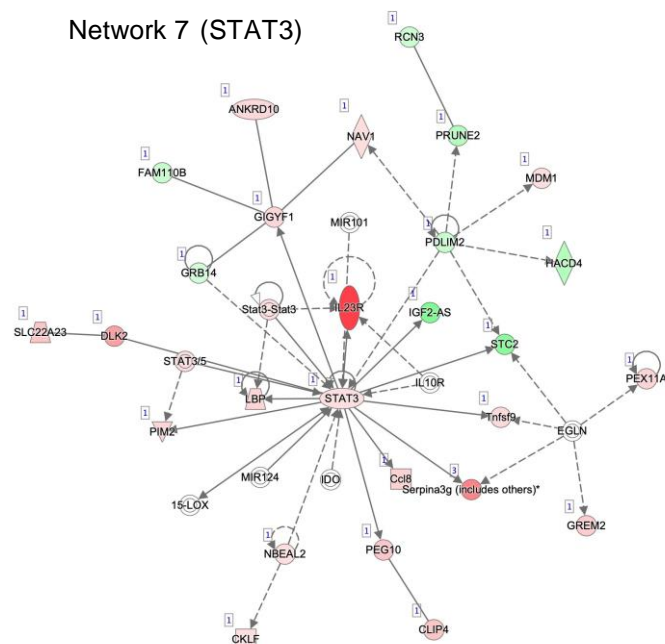

C

Network 10 (TGFB1)

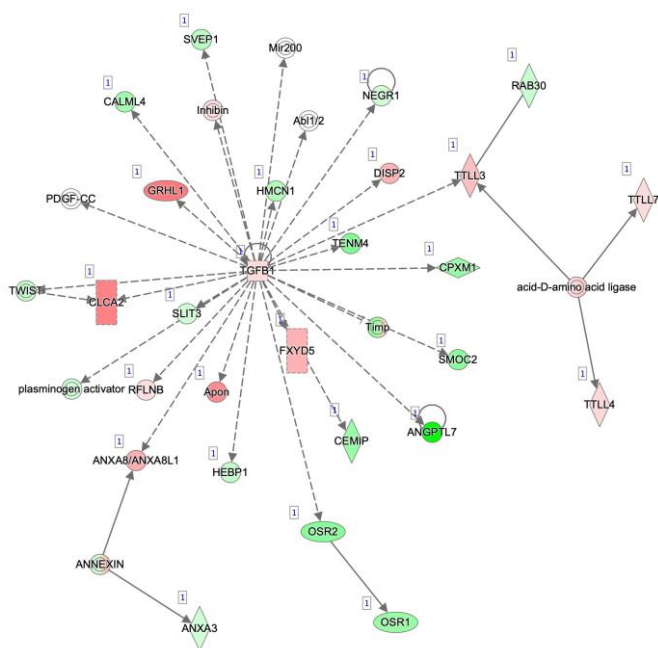

Figure S4: Causal networks related to AGT (network 5, A), STAT3 (network 7, B), and TGF $\beta$ 1 (network 10, C). The prediction legend is shown in Figure S1.
